# Supplementary material for: HNF4α and CDX2 Regulate Intestinal YAP1 Promoter Activity
Source: Int J Mol Sci. 2019 Jun 18;20(12):2981. doi: 10.3390/ijms20122981 (PMC6627140; doi:10.3390/ijms20122981)
Supplement: Supplementary file 1 [file ijms-20-02981-s001.zip]

Archive with 6 entries (6 files):
- S01 supplementary table S1 V06.docx
- S01 supplementary table S1 V06.pdf
- S02 supplementary table S2 V02.docx
- S02 supplementary table S2 V02.pdf
- S03 supplementary table S3 V02.docx
- S03 supplementary table S3 V02.pdf
