# Supplementary material for: HNF4α and CDX2 Regulate Intestinal YAP1 Promoter Activity
Source: Int J Mol Sci. 2019 Jun 18;20(12):2981. doi: 10.3390/ijms20122981 (PMC6627140; doi:10.3390/ijms20122981)
Supplement: Supplementary file 1 [file ijms-20-02981-s001.zip › S01 supplementary table S1 V06.pdf]

**Table S1.** Transcription factor binding sites from an *in-silico* analysis using the online JASPAR tool (URL: <http://jaspar.genereg.net>). *YAP1* input sequence is from the USCS Feb. 2009 GRCh37/hg19 genome assembly. The *YAP1* promoter input sequence spans 972bp at (-0.7kb to +0.3 kb from the TSS; chr11:101,980,493-101,981,464), the *YAP1* enhancer input sequence spans 599bp at (+82.2kb to +82.8kb from the TSS; chr11:102,063,361-102,063,959), the *YAP1* intron 1 input sequence spans 2173bp at (+1.1kb to +3.2kb from the TSS; chr11:101982249-101983075), and the *YAP1* intron 3 input sequence spans 633bp at (+67.5kb to +68.3kb from the TSS; chr11:102048671-102049303). CDX2 and HNF4 $\alpha$  sites were predicted in the regions using the MA0465.1 and MA0114.2 matrices and a relative score cutoff of 75% to 85%. The location of the binding sites in the genome is given relative to the transcription start site (TSS) of *YAP1* at chr11:101,981,192.

| 2 HNF4 $\alpha$ and 2 CDX2 sites were predicted in the <i>YAP1</i> promoter                   |               |        |                |        |                         |                     |
|-----------------------------------------------------------------------------------------------|---------------|--------|----------------|--------|-------------------------|---------------------|
| Model ID & name                                                                               |               | Score  | Relative score | Strand | Predicted site sequence | Loc Relative to TSS |
| MA0114.2 HNF4A                                                                                |               | 7.770  | 0.838          | 1      | TCGGCCTTGGCCCTT         | -466                |
| MA0114.2 HNF4A                                                                                |               | 7.483  | 0.834          | -1     | GAGAACTTTTTCCT          | +111                |
| MA0465.1 CDX2                                                                                 |               | 6.636  | 0.852          | 1      | GAACAAGAAAA             | +34                 |
| MA0465.1 CDX2                                                                                 |               | 7.394  | 0.864          | 1      | AGGAAATAAAG             | +44                 |
| 2 HNF4 $\alpha$ and 3 CDX2 sites were predicted in the <i>YAP1</i> enhancer (intron 4 region) |               |        |                |        |                         |                     |
| Model ID & name                                                                               | Site name     | Score  | Relative score | Strand | Predicted site sequence | Loc Relative to TSS |
| MA0114.2 HNF4A                                                                                |               | 10.168 | 0.870          | 1      | TTTAACTTTGGTCCT         | +82335              |
| MA0114.2 HNF4A                                                                                | HNF4 $\alpha$ | 12.496 | 0.901          | -1     | CTGAACTTTGCTAAC         | +82569              |
| MA0465.1 CDX2                                                                                 | CDX2-S2       | 12.227 | 0.936          | -1     | GTGCAATAAAT             | +82554              |
| MA0465.1 CDX2                                                                                 | CDX2-S1       | 14.121 | 0.965          | -1     | AGGCAATAAAG             | +82320              |

| 2 CDX2 and 5 HNF4 $\alpha$ sites were predicted in the YAP1 intron 1 region |           |       |                |        |                         |                     |
|-----------------------------------------------------------------------------|-----------|-------|----------------|--------|-------------------------|---------------------|
| Model ID & name                                                             |           | Score | Relative score | Strand | Predicted site sequence | Loc Relative to TSS |
| MA0465.1 CDX2                                                               |           | 5.829 | 0.840          | -1     | GAGCAAAAAAC             | +1335               |
| MA0465.1 CDX2                                                               |           | 3.874 | 0.811          | -1     | GGAAAATAAAT             | +1391               |
| MA0114.2 HNF4A                                                              |           | 7.915 | 0.840          | +1     | GGGGCCTCTGGCATT         | +1157               |
| MA0114.2 HNF4A                                                              |           | 6.273 | 0.818          | +1     | TTGAGCCCTGGGCCC         | +1213               |
| MA0114.2 HNF4A                                                              |           | 6.131 | 0.816          | +1     | TTGGAACTTGGGCCG         | +1506               |
| MA0114.2 HNF4A                                                              |           | 5.879 | 0.813          | -1     | CAGGACTTGGCCTAT         | +1699               |
| MA0114.2 HNF4A                                                              |           | 5.329 | 0.805          | -1     | TTGGCCTATGAGTCA         | +1705               |
| 2 HNF4 $\alpha$ and 4 CDX2 sites were predicted in the YAP1 intron 3 region |           |       |                |        |                         |                     |
| Model ID & name                                                             | Site name | Score | Relative score | Strand | Predicted site sequence | Loc Relative to TSS |
| MA0114.2 HNF4A                                                              |           | 3.813 | 0.785          | +1     | CTGTACTTTGTAGGA         | +67841              |
| MA0114.2 HNF4A                                                              |           | 1.639 | 0.756          | -1     | ATGACCTTTTAAAGG         | +67771              |
| MA0465.1 CDX2                                                               |           | 7.540 | 0.866          | -1     | ATGTCATAACA             | +68074              |
| MA0465.1 CDX2                                                               |           | 5.718 | 0.838          | -1     | TGGGAATAAAG             | +67900              |
| MA0465.1 CDX2                                                               |           | 5.071 | 0.829          | +1     | GTATAATAATA             | +67615              |
| MA0465.1 CDX2                                                               |           | 3.772 | 0.809          | +1     | TCATCATAAAT             | +67718              |
