# Supplementary material for: HNF4α and CDX2 Regulate Intestinal YAP1 Promoter Activity
Source: Int J Mol Sci. 2019 Jun 18;20(12):2981. doi: 10.3390/ijms20122981 (PMC6627140; doi:10.3390/ijms20122981)
Supplement: Supplementary file 1 [file ijms-20-02981-s001.zip › S02 supplementary table S2 V02.pdf]

**Table S1.** Primers used to produce the luciferase reporter constructs. Primers with In-Fusion overhangs contain the prefix “inf” and the overhang sequences are underlined. Bold text denotes the sequence of restriction sites replacing transcription factor binding sites via site-directed mutagenesis; **B)** Primers used for real-time PCR in the analysis of chromatin immune precipitated DNA from Caco-2 nuclear extract.

| <b>A) Primers used for reporter constructs</b> |                                                          |                  |
|------------------------------------------------|----------------------------------------------------------|------------------|
| Primer name                                    | Primer Sequence                                          | Restriction site |
| <i>YAP1</i> Prom-F                             | CCGTTTACCCCTCTCAAGTG                                     |                  |
| <i>YAP1</i> Prom-R                             | GCTGTCCTCGCTCTCAGG                                       |                  |
| Inf- <i>YAP1</i> Prom-F                        | <u>CTCGGCGGCC</u> <b>AAGCTT</b> CCGTTTACCCCTCTCAAGTG     | HindIII          |
| Inf- <i>YAP1</i> Prom-R                        | <u>CCGGATTGCC</u> <b>AAGCTT</b> GCTGTCCTCGCTCTCAGG       | HindIII          |
| <i>YAP1</i> enhancer-F                         | TGACTGGATTAGACTGGATGCT                                   |                  |
| <i>YAP1</i> enhancer-R                         | GGAAAAAGAAAATGTAGTGAGAGC                                 |                  |
| Inf- <i>YAP1</i> enhancer-F                    | <u>ATAAGGATCC</u> <b>GTCGAC</b> TGACTGGATTAGACTGGATGCT   | Sal1             |
| Inf- <i>YAP1</i> enhancer-R                    | <u>AAGGGCATCG</u> <b>GTCGAC</b> GGAAAAAGAAAATGTAGTGAGAGC | Sal1             |

| <b>B) Primers used for ChIP analysis</b> |                      |
|------------------------------------------|----------------------|
| Primer name                              | Primer Sequence      |
| YAP1-enhancer F                          | CCTCTGGTCACAGTGTGGAA |
| YAP1-enhancer R                          | TTGCCTGGACATACTACCA  |
