# Supplementary material for: HNF4α and CDX2 Regulate Intestinal YAP1 Promoter Activity
Source: Int J Mol Sci. 2019 Jun 18;20(12):2981. doi: 10.3390/ijms20122981 (PMC6627140; doi:10.3390/ijms20122981)
Supplement: Supplementary file 1 [file ijms-20-02981-s001.zip › S03 supplementary table S3 V02.pdf]

**Table S3.** Double-stranded oligonucleotides used for electrophoretic mobility shift assay (EMSA) and for constructing pGL4.10-*YAP1* promoter+enhancer constructs with mutated CDX2 and HNF4 $\alpha$  binding sites. The wildtype or mutated binding sites are marked in bold.

| Oligos                  | Sequences 5' -> 3'                                                                                  |
|-------------------------|-----------------------------------------------------------------------------------------------------|
| Non-specific competitor | 5' AACGTAGCTGATCGAATCGGTTAC<br>3' TGCATCGACTAGCTTAGCCAATGA                                          |
| CDX2-S1                 | 5' TTTTGAACATA <b>TTTATT</b> GCACCATT<br>3' AAACCTTGATA <b>AAATAA</b> CGTGGTAAA                     |
| CDX2-S1-Mut             | 5' AGATACTTTTGAAC <b>CTGCAG</b> GCACCATTTAAGTT<br>3' CTATGAAACTTGAG <b>GACGTC</b> CGTGGTAAATTCAA    |
| CDX2-S2                 | 5' AAGTTCAGC <b>TTTATT</b> GCCTTAAAG<br>3' TCAAGTCG <b>AAATAA</b> CGGAATTTCT                        |
| CDX2-S2-Mut             | 5' TTAGCAAAGTTCAGC <b>CTCGAG</b> GCCTTAAAGATGAT<br>3' ATCGTTTCAAGTCG <b>GAGCTC</b> CGGAATTTCTACTAC  |
| HNF4 $\alpha$           | 5' TTCATGTTAG <b>CAAAGT</b> TCAGCTTT<br>3' AGTACAATC <b>GTTTCA</b> AGTCGAAAT                        |
| HNF4 $\alpha$ -Mut      | 5' ACATGTTTCATGTTAG <b>TCTAGA</b> TCAGCTTTATTGCC<br>3' GTACAAGTACAATC <b>AGATCT</b> AGTCGAAATAACGGA |
